# Supplementary material
Source: HighWire-hosted journal article supplement (https://erj.ersjournals.com/content/58/1/2002724)
Supplement: inline-supplementary-material-2 [file inline-supplementary-material-2.pdf]

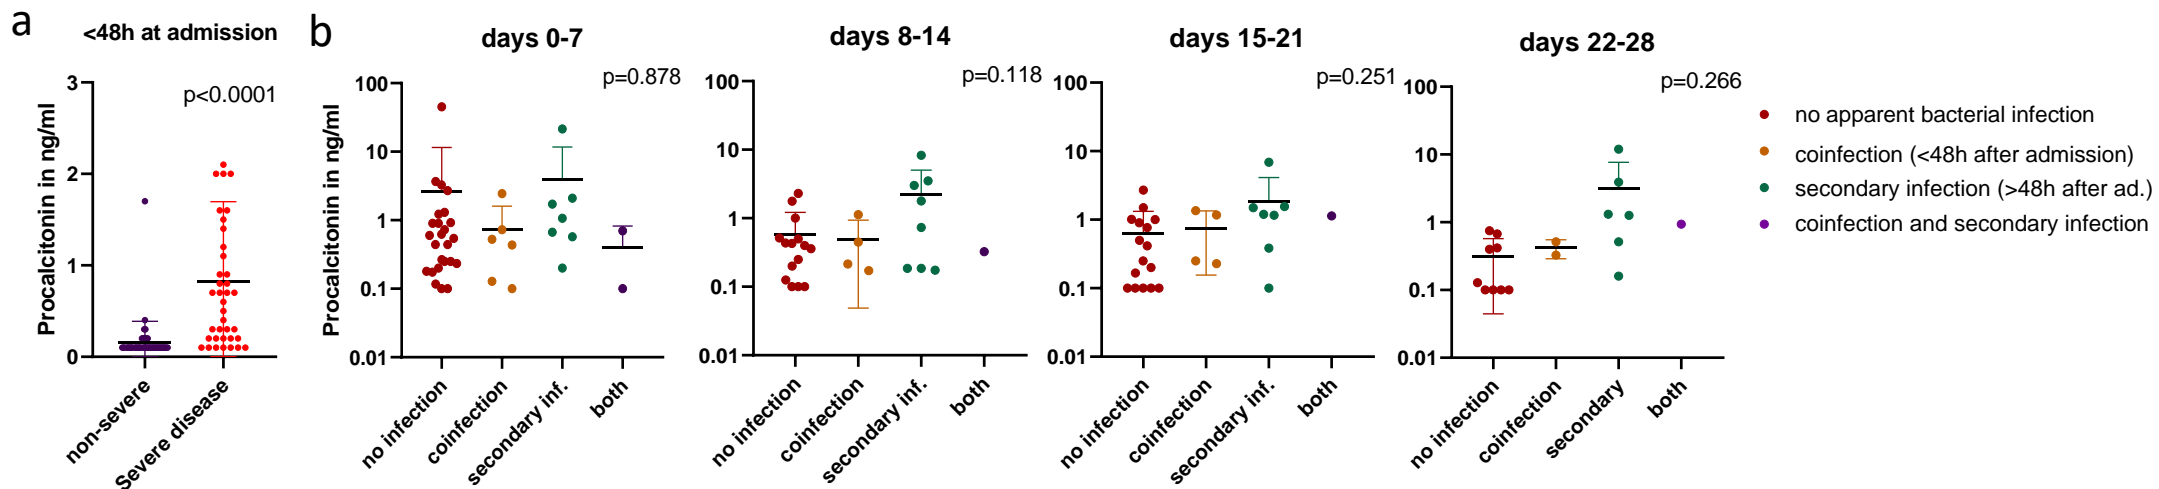

**Figure S2a:** PCT values at admission (PCT measured <48h after admission) of severe and non-severe disease **b** PCT levels in the subgroups of bacterial coinfection and secondary bacterial infection. ANOVA determined differences of means. Error bars denote mean and standard deviation.
