# Supplementary material
Source: HighWire-hosted journal article supplement (https://erj.ersjournals.com/content/58/1/2002724)
Supplement: inline-supplementary-material-4 [file inline-supplementary-material-4.pdf]

|                  |                                        | week 1               | week 2                | week 3                 | week 4                 |
|------------------|----------------------------------------|----------------------|-----------------------|------------------------|------------------------|
| Severe           | Number of patients tested              | 16                   | 15                    | 11                     | 18                     |
|                  | Mean Average viral load (in copies/ml) | 22x10 <sup>6</sup>   | 42 x 10 <sup>6</sup>  | 0.47 x 10 <sup>6</sup> | 1.1 x 10 <sup>6</sup>  |
| Mild to moderate | Number of patients tested              | 34                   | 32                    | 24                     | 10                     |
|                  | Mean Average viral load (in copies/ml) | 15 x 10 <sup>6</sup> | 2.1 x 10 <sup>6</sup> | 2.9 x 10 <sup>6</sup>  | 0.04 x 10 <sup>6</sup> |
| T-Test           | P value                                | 0.17                 | 0.03                  | 0.60                   | 0.90                   |

**Table S2:** Comparison of average viral load in NPS according to time point and disease severity. (Student's T-Test). NPS: nasopharyngeal swabs.
