# Supplementary material
Source: HighWire-hosted journal article supplement (https://erj.ersjournals.com/content/58/1/2002724)
Supplement: inline-supplementary-material-5 [file inline-supplementary-material-5.pdf]

| CRP              |                                                   |         |         |        |        |
|------------------|---------------------------------------------------|---------|---------|--------|--------|
|                  |                                                   | week 1  | week 2  | week 3 | week 4 |
| Severe           | Number of patients tested                         | 21      | 37      | 33     | 30     |
|                  | Mean Average concentration in mg dl <sup>-1</sup> | 14.19   | 13.34   | 7.50   | 5.66   |
| Mild to moderate | Number of patients tested                         | 38      | 44      | 29     | 12     |
|                  | Mean Average concentration in mg dl <sup>-1</sup> | 4.01    | 3.57    | 3.60   | 3.36   |
| T-Test           | P value                                           | <0.0001 | <0.0001 | 0.0014 | 0.25   |

| II-6             |                                                   |         |         |         |        |
|------------------|---------------------------------------------------|---------|---------|---------|--------|
|                  |                                                   | week 1  | week 2  | week 3  | week 4 |
| Severe           | Number of patients tested                         | 21      | 35      | 32      | 29     |
|                  | Mean Average concentration in ng ml <sup>-1</sup> | 214.1   | 400.1   | 141.4   | 549.5  |
| Mild to moderate | Number of patients tested                         | 38      | 43      | 28      | 12     |
|                  | Mean Average concentration in ng ml <sup>-1</sup> | 69.0    | 21.3    | 22.3    | 24.3   |
| T-Test           | P value                                           | <0.0001 | <0.0001 | <0.0001 | 0.1199 |

| Procalcitonin    |                                                   |        |        |        |        |
|------------------|---------------------------------------------------|--------|--------|--------|--------|
|                  |                                                   | week 1 | week 2 | week 3 | week 4 |
| Severe           | Number of patients tested                         | 21     | 32     | 29     | 24     |
|                  | Mean Average concentration in ng ml <sup>-1</sup> | 0.90   | 3.30   | 1.67   | 0.53   |
| Mild to moderate | Number of patients tested                         | 36     | 44     | 28     | 12     |

|        |                                                   |         |         |         |      |
|--------|---------------------------------------------------|---------|---------|---------|------|
|        | Mean Average concentration in ng ml <sup>-1</sup> | 0.632   | 0.222   | 0.13    | 0.24 |
| T-Test | P value                                           | <0.0001 | <0.0001 | <0.0001 | 0.90 |

**Table S3:** Comparison of CRP, Il-6 and PCT according to time point and disease severity. (Student's T-Test).
